# Supplementary material for: The Use of Hybrid Genetic Algorithm in the Kinetic Analysis of Thermal Decomposition of [Ni(C2H8N2)3](ClO4)2 with Overlapping Stages
Source: MDPI journal article supplement (doi:10.3390/ma16010090), 2022-12-22
Supplement: s1 [file s1]

## Supplementary Materials

### THE USE OF HYBRID GENERIC ALGORITHM IN THE KINETIC ANALYSIS OF THERMAL DECOMPOSITION OF $[\text{Ni}(\text{C}_2\text{H}_8\text{N}_2)_3](\text{ClO}_4)_2$ WITH OVERLAPPING STAGES

**Kirill A. Dmitruk** <sup>1,2</sup>, **Oxana V. Komova** <sup>1,4,\*</sup>, **Alexander A. Paletsky** <sup>1,3</sup>, **Andrey G. Shmakov** <sup>3</sup>, **Svetlana A. Mukha** <sup>1</sup>, **Vladislav R. Butenko** <sup>1,2</sup>, **Alena A. Pochtar** <sup>1,2</sup>, **Olga V. Netskina** <sup>1,2</sup>

<sup>1</sup> Boreskov Institute of Catalysis SB RAS, 5 Akademika Lavrentieva ave., 630090 Novosibirsk, Russia

<sup>2</sup> Novosibirsk State University, 1 Pirogova str., Novosibirsk, 630090, Russia

<sup>3</sup> Voevodsky Institute of Chemical Kinetics and Combustion SB RAS, 3 Institutskaya str., 630090 Novosibirsk, Russia

<sup>4</sup> Siberian Branch of Russian Academy of Sciences, 17 Akademika Lavrentieva ave., 630090 Novosibirsk, Russia

\* Correspondence: komova@catalysis.ru (O.V.K.) Tel.: +7-383-330-74-58

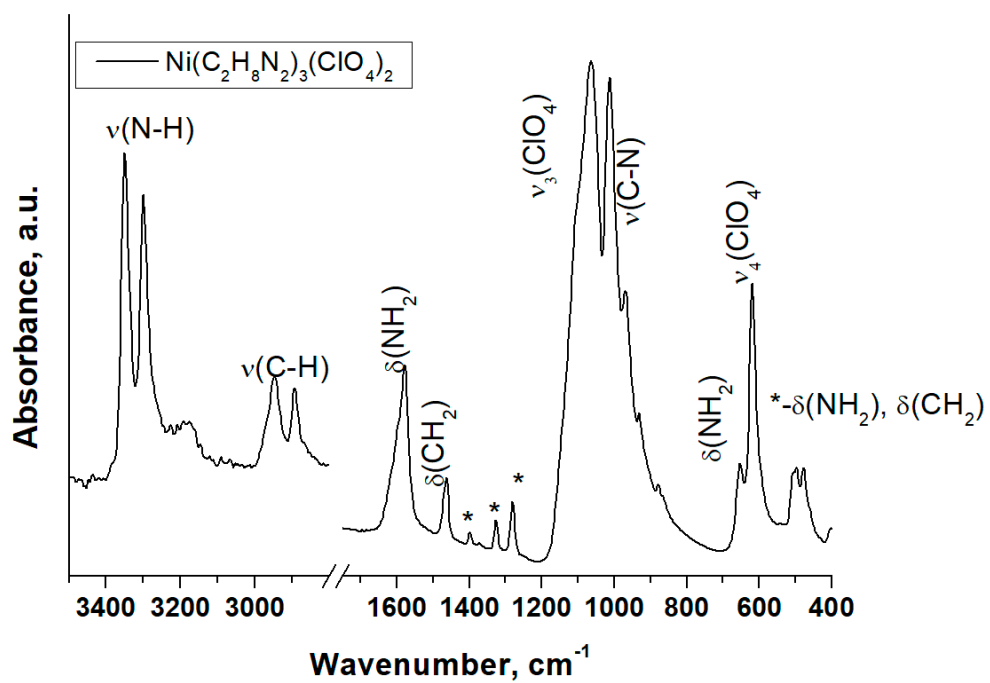

**Figure S1.** ATR FTIR spectrum of synthesized  $[\text{Ni}(\text{En})_3](\text{ClO}_4)_2$ .

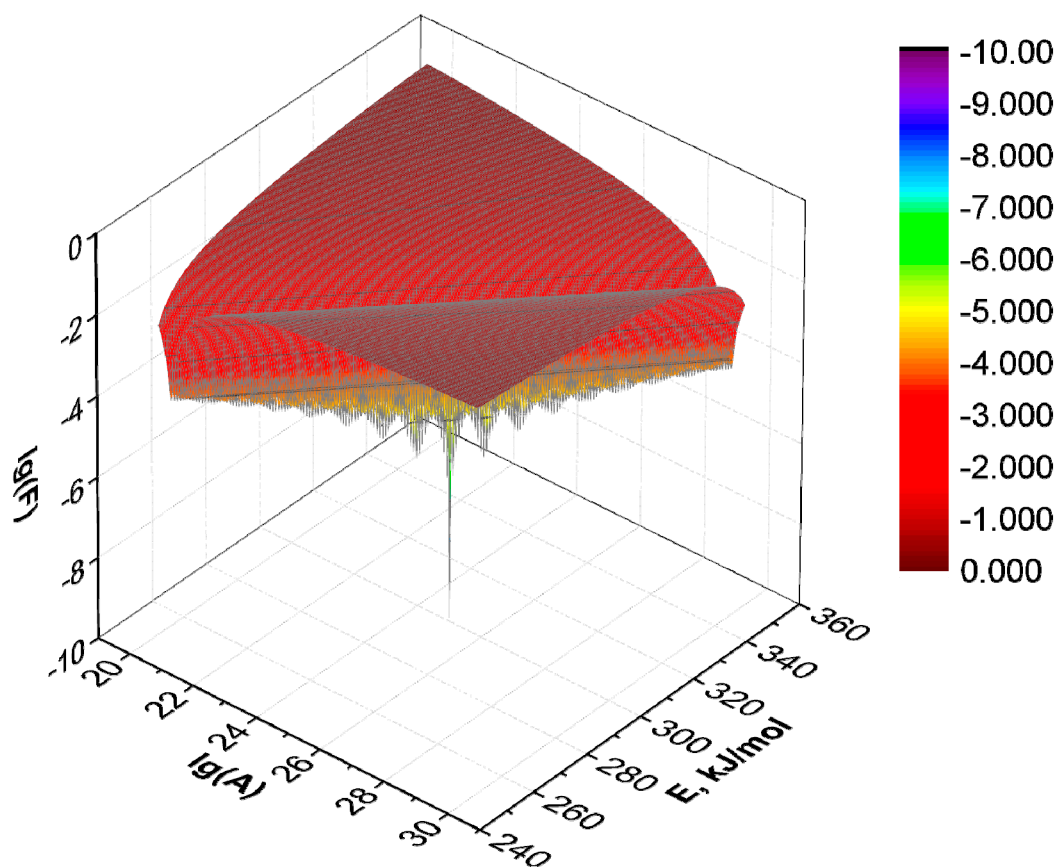

**Figure S2.** Example of the surface of the functional (Eq. 6) for a single-stage simulated DTG curve (first order kinetics (Table 1),  $\lg A = 25$ ,  $E = 300 \text{ kJ/mol}$ ).

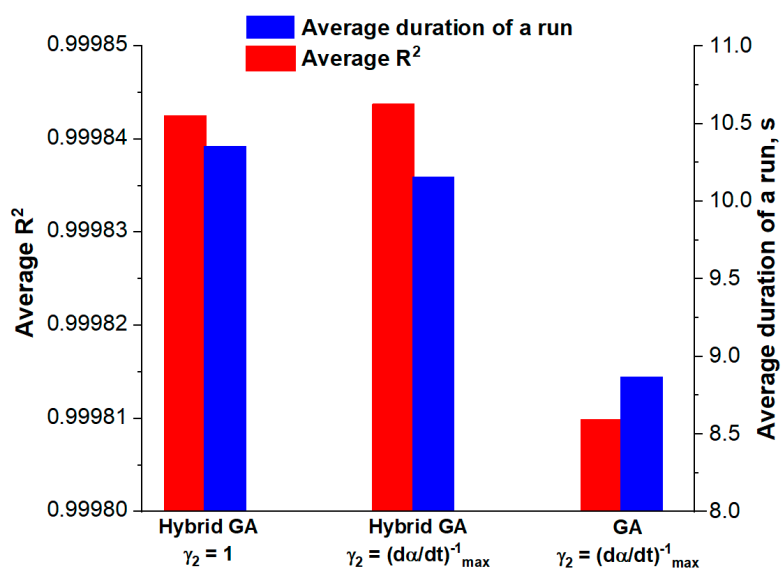

**Figure S3.** Average determination coefficient  $R^2$  and average duration of single run of the algorithm for the modeling of the thermogravimetry data of  $[\text{Ni}(\text{En})_3](\text{ClO}_4)_2$  decomposition as two-stage first order kinetics process using the hybrid GA with the traditional  $\gamma_2=1$ , hybrid GA with the  $\gamma_2$  proposed in this work and non-hybrid GA.

*40 runs have been performed in each case.*

**Table S1.** Logarithms of the optimized values of the objective function (lgF) of all results of the modeling of the simulated curve (Table 2) using the hybrid GA.

| Model   | 1     | 2     | 3     | 4     | 5     | 6     | 7     | 8      | 9     | 10    | 11    | n = 1/3 | n = 3/4 | n = 1 | n = 1.5 | n = 2 | n = 3 |
|---------|-------|-------|-------|-------|-------|-------|-------|--------|-------|-------|-------|---------|---------|-------|---------|-------|-------|
| 1       | -3.04 |       |       |       |       |       |       |        |       |       |       |         |         |       |         |       |       |
| 2       | -3.04 | -5.20 |       |       |       |       |       |        |       |       |       |         |         |       |         |       |       |
| 3       | -3.00 | -5.09 | -3.04 |       |       |       |       |        |       |       |       |         |         |       |         |       |       |
| 4       | -5.05 | -4.84 | -4.21 | -3.22 |       |       |       |        |       |       |       |         |         |       |         |       |       |
| 5       | -5.04 | -4.56 | -4.66 | -3.65 | -4.34 |       |       |        |       |       |       |         |         |       |         |       |       |
| 6       | -4.72 | -5.02 | -4.06 | -5.61 | -5.63 | -3.66 |       |        |       |       |       |         |         |       |         |       |       |
| 7       | -4.41 | -3.18 | -2.97 | -5.26 | -5.01 | -5.84 | -4.47 |        |       |       |       |         |         |       |         |       |       |
| 8       | -5.11 | -4.19 | -5.09 | -5.20 | -5.20 | -6.08 | -7.39 | -6.47  |       |       |       |         |         |       |         |       |       |
| 9       | -5.23 | -5.22 | -3.93 | -5.60 | -5.05 | -5.05 | -5.71 | -5.92  | -4.09 |       |       |         |         |       |         |       |       |
| 10      | -5.53 | -4.99 | -5.01 | -5.57 | -5.57 | -5.57 | -5.50 | -10.82 | -4.98 | -5.63 |       |         |         |       |         |       |       |
| 11      | -5.30 | -5.30 | -5.29 | -5.85 | -5.55 | -5.32 | -5.35 | -6.05  | -5.30 | -3.41 | -5.08 |         |         |       |         |       |       |
| n = 1/3 | -3.71 | -5.04 | -4.28 | -5.25 | -5.72 | -5.26 | -4.37 | -6.66  | -5.55 | -5.08 | -5.34 | -5.06   |         |       |         |       |       |
| n = 3/4 | -4.77 | -4.78 | -4.78 | -5.14 | -5.59 | -4.07 | -4.90 | -8.18  | -5.60 | -5.64 | -5.62 | -5.08   | -4.70   |       |         |       |       |
| n = 1   | -5.48 | -5.49 | -4.75 | -5.58 | -5.59 | -5.22 | -5.60 | -4.50  | -5.47 | -5.56 | -5.66 | -5.60   | -5.63   | -5.17 |         |       |       |
| n = 1.5 | -5.60 | -4.21 | -4.85 | -5.60 | -5.61 | -5.61 | -5.76 | -7.17  | -5.59 | -5.57 | -5.85 | -5.71   | -4.70   | -5.47 | -4.63   |       |       |
| n = 2   | -5.39 | -3.51 | -3.51 | -5.54 | -5.55 | -5.55 | -5.55 | -6.51  | -5.38 | -4.49 | -5.54 | -5.07   | -4.83   | -4.91 | -5.54   | -4.41 |       |
| n = 3   | -3.34 | -3.34 | -3.34 | -5.45 | -5.46 | -5.46 | -5.51 | -6.36  | -5.26 | -5.26 | -5.48 | -5.46   | -4.71   | -3.86 | -5.45   | -3.45 | -3.08 |

**Table S2.** Results of the modeling of the ethylenediamine ( $m/z = 30$ ) evolution curve during the dynamic mass-spectral thermal analysis of  $[\text{Ni}(\text{En})_3](\text{ClO}_4)_2$  using the hybrid GA.

| Model        | lgF   | lgF before 216 °C | lgA   | E, kJ/mol |
|--------------|-------|-------------------|-------|-----------|
| 4            | -2.07 | -1.86             | 6.63  | 61        |
| 5            | -2.07 | -1.85             | 2.98  | 29        |
| 6            | -2.07 | -1.85             | 1.23  | 14        |
| 7            | -2.06 | -2.03             | 13.04 | 122       |
| 12 (n = 1)   | -2.05 | -1.86             | 18.78 | 171       |
| 11           | -2.03 | -2.07             | 31.48 | 296       |
| 12 (n = 1.5) | -1.85 | -1.69             | 23.88 | 216       |
| 12 (n = 2)   | -1.69 | -1.55             | 28.74 | 260       |
| 12 (n = 2.5) | -1.56 | -1.45             | 33.43 | 302       |
| 8            | -1.55 | -1.55             | 7.61  | 75        |
| 12 (n = 3)   | -1.46 | -1.38             | 38.01 | 343       |
| 12 (n = 3.5) | -1.39 | -1.31             | 42.49 | 383       |
| 9            | -1.35 | -1.39             | 16.48 | 153       |
| 1            | -1.32 | -1.34             | 1.00  | 13        |
| 10           | -1.29 | -1.20             | 21.87 | 210       |
| 2            | -1.02 | -1.13             | 1.00  | 13        |
| 3            | -0.67 | -0.79             | 1.00  | 14        |

**Table S3.** Results of the modeling of the thermogravimetric analysis data of  $[\text{Ni}(\text{En})_3](\text{ClO}_4)_2$  thermolysis ( $\beta=5\text{ }^\circ\text{C}\cdot\text{min}^{-1}$ ) as a single-stage process using the hybrid GA.

| Model        | lgF   | lgA   | E, kJ/mol |
|--------------|-------|-------|-----------|
| 1            | -2.74 | 5.74  | 84        |
| 2            | -2.70 | 2.54  | 53        |
| 3            | -2.60 | 1.00  | 38        |
| 4            | -4.37 | 10.18 | 126       |
| 5            | -4.36 | 5.59  | 82        |
| 6            | -4.35 | 3.27  | 59        |
| 7            | -3.34 | 18.17 | 209       |
| 8            | -2.95 | 18.98 | 219       |
| 9            | -2.72 | 30.13 | 329       |
| 10           | -3.69 | 42.66 | 460       |
| 11           | -3.21 | 37.94 | 414       |
| 12 (n = 1)   | -4.37 | 23.79 | 261       |
| 12 (n = 1.5) | -3.53 | 29.31 | 314       |
| 12 (n = 2)   | -3.09 | 34.98 | 370       |
| 12 (n = 2.5) | -2.84 | 40.86 | 427       |
| 12 (n = 3)   | -2.69 | 46.97 | 487       |
| 12 (n = 3.5) | -2.58 | 53.29 | 548       |

**Table S4.** Logarithms of the optimized values of the objective function (lgF) of all results of the modeling of the thermogravimetric analysis data of  $[\text{Ni}(\text{En})_3](\text{ClO}_4)_2$  thermolysis ( $\beta=5\text{ }^\circ\text{C}\cdot\text{min}^{-1}$ ) as a two-stage process using the hybrid GA.

| Model   | 1     | 2     | 3     | 4     | 5     | 6     | 7     | 8     | 9     | 10    | 11    | n = 1 | n = 1.5 | n = 2 | n = 2.5 | n = 3 | n = 3.5 |
|---------|-------|-------|-------|-------|-------|-------|-------|-------|-------|-------|-------|-------|---------|-------|---------|-------|---------|
| 1       | -2.88 |       |       |       |       |       |       |       |       |       |       |       |         |       |         |       |         |
| 2       | -2.74 | -2.70 |       |       |       |       |       |       |       |       |       |       |         |       |         |       |         |
| 3       | -2.40 | -2.75 | -2.64 |       |       |       |       |       |       |       |       |       |         |       |         |       |         |
| 4       | -4.80 | -4.37 | -4.63 | -4.40 |       |       |       |       |       |       |       |       |         |       |         |       |         |
| 5       | -4.58 | -4.57 | -4.61 | -4.37 | -4.36 |       |       |       |       |       |       |       |         |       |         |       |         |
| 6       | -4.44 | -4.56 | -4.35 | -4.40 | -4.40 | -4.39 |       |       |       |       |       |       |         |       |         |       |         |
| 7       | -2.91 | -4.40 | -4.24 | -4.73 | -4.46 | -4.49 | -4.79 |       |       |       |       |       |         |       |         |       |         |
| 8       | -3.24 | -3.16 | -3.16 | -4.81 | -4.56 | -3.16 | -4.56 | -3.33 |       |       |       |       |         |       |         |       |         |
| 9       | -3.47 | -3.26 | -3.16 | -4.77 | -4.58 | -4.57 | -4.43 | -3.51 | -3.56 |       |       |       |         |       |         |       |         |
| 10      | -4.13 | -4.10 | -4.69 | -5.01 | -4.87 | -4.85 | -4.83 | -4.13 | -4.13 | -4.98 |       |       |         |       |         |       |         |
| 11      | -3.82 | -3.77 | -3.98 | -4.44 | -4.93 | -4.38 | -4.79 | -3.82 | -3.74 | -5.09 | -4.06 |       |         |       |         |       |         |
| n = 1   | -4.81 | -4.76 | -4.47 | -4.47 | -5.02 | -4.40 | -5.00 | -4.40 | -4.81 | -4.87 | -4.84 | -5.02 |         |       |         |       |         |
| n = 1.5 | -4.75 | -4.08 | -4.00 | -5.10 | -5.10 | -4.12 | -5.02 | -4.70 | -4.76 | -5.11 | -4.76 | -5.10 | -5.03   |       |         |       |         |
| n = 2   | -4.44 | -3.66 | -3.77 | -5.10 | -5.09 | -3.69 | -4.88 | -3.95 | -4.45 | -5.03 | -4.77 | -5.10 | -5.08   | -4.72 |         |       |         |
| n = 2.5 | -4.24 | -4.09 | -3.31 | -5.11 | -5.10 | -5.08 | -4.69 | -3.76 | -4.25 | -4.99 | -4.65 | -5.11 | -5.04   | -4.54 | -4.20   |       |         |
| n = 3   | -4.12 | -3.97 | -3.35 | -5.12 | -5.11 | -5.08 | -4.59 | -3.65 | -4.13 | -4.98 | -4.60 | -5.12 | -4.99   | -4.43 | -4.08   | -3.88 |         |
| n = 3.5 | -4.04 | -3.89 | -2.92 | -5.12 | -5.12 | -3.24 | -4.52 | -3.36 | -4.04 | -4.96 | -4.55 | -5.13 | -4.95   | -4.35 | -4.01   | -3.19 | -3.67   |



**Table S5.** Mass loss (%) attributed to the stage A for all results of the modeling of the thermogravimetric analysis data of  $[\text{Ni}(\text{En})_3](\text{ClO}_4)_2$  thermolysis ( $\beta=5\text{ }^\circ\text{C}\cdot\text{min}^{-1}$ ) as a two-stage process using the hybrid GA.

| Model   | 1     | 2     | 3     | 4     | 5     | 6     | 7     | 8     | 9     | 10    | 11    | n = 1 | n = 1.5 | n = 2 | n = 2.5 | n = 3 | n = 3.5 |
|---------|-------|-------|-------|-------|-------|-------|-------|-------|-------|-------|-------|-------|---------|-------|---------|-------|---------|
| 1       | 9.6%  |       |       |       |       |       |       |       |       |       |       |       |         |       |         |       |         |
| 2       | 35.5% | 35.2% |       |       |       |       |       |       |       |       |       |       |         |       |         |       |         |
| 3       | 12.1% | 33.4% | 33.9% |       |       |       |       |       |       |       |       |       |         |       |         |       |         |
| 4       | 5.1%  | 35.5% | 3.6%  | 35.5% |       |       |       |       |       |       |       |       |         |       |         |       |         |
| 5       | 3.9%  | 3.5%  | 33.3% | 35.5% | 35.5% |       |       |       |       |       |       |       |         |       |         |       |         |
| 6       | 35.1% | 3.5%  | 35.5% | 35.5% | 35.5% | 35.2% |       |       |       |       |       |       |         |       |         |       |         |
| 7       | 15.3% | 7.5%  | 32.7% | 29.3% | 0.5%  | 27.1% | 23.7% |       |       |       |       |       |         |       |         |       |         |
| 8       | 20.0% | 32.5% | 32.5% | 3.3%  | 34.3% | 32.5% | 31.5% | 20.1% |       |       |       |       |         |       |         |       |         |
| 9       | 16.4% | 20.0% | 18.1% | 32.0% | 31.6% | 31.5% | 21.4% | 18.9% | 14.0% |       |       |       |         |       |         |       |         |
| 10      | 6.8%  | 6.2%  | 33.4% | 9.2%  | 26.0% | 21.3% | 21.9% | 5.9%  | 28.7% | 2.2%  |       |       |         |       |         |       |         |
| 11      | 11.0% | 10.3% | 32.6% | 34.8% | 23.2% | 7.1%  | 24.1% | 9.7%  | 20.2% | 12.8% | 28.1% |       |         |       |         |       |         |
| n = 1   | 5.1%  | 3.9%  | 35.1% | 35.0% | 9.8%  | 35.5% | 15.6% | 0.3%  | 30.4% | 2.2%  | 6.2%  | 25.7% |         |       |         |       |         |
| n = 1.5 | 8.7%  | 4.8%  | 3.8%  | 17.8% | 17.8% | 31.8% | 15.7% | 3.7%  | 8.8%  | 12.7% | 11.6% | 17.7% | 6.2%    |       |         |       |         |
| n = 2   | 13.0% | 8.4%  | 12.8% | 23.5% | 23.4% | 5.8%  | 19.5% | 10.4% | 13.1% | 12.5% | 18.1% | 12.1% | 11.8%   | 13.7% |         |       |         |
| n = 2.5 | 15.7% | 14.8% | 3.0%  | 25.7% | 25.7% | 25.6% | 22.7% | 13.9% | 15.7% | 25.1% | 20.3% | 9.8%  | 8.9%    | 11.6% | 14.2%   |       |         |
| n = 3   | 17.5% | 16.6% | 17.1% | 27.0% | 26.9% | 27.6% | 24.3% | 16.3% | 17.5% | 26.4% | 22.1% | 8.6%  | 7.7%    | 10.3% | 12.6%   | 14.3% |         |
| n = 3.5 | 18.8% | 18.0% | 8.2%  | 27.7% | 27.7% | 9.6%  | 25.4% | 20.3% | 18.8% | 27.3% | 23.3% | 7.8%  | 28.5%   | 9.5%  | 11.6%   | 32.0% | 14.3%   |

**Table S6.** Activation energy (kJ/mol) of stage A for all results of the modeling of the thermogravimetric analysis data of  $[\text{Ni}(\text{En})_3](\text{ClO}_4)_2$  thermolysis ( $\beta=5\text{ }^\circ\text{C}\cdot\text{min}^{-1}$ ) as a two-stage process using the hybrid GA.

|         | 1   | 2   | 3   | 4   | 5   | 6   | 7   | 8   | 9   | 10  | 11  | n = 1 | n = 1.5 | n = 2 | n = 2.5 | n = 3 | n = 3.5 |
|---------|-----|-----|-----|-----|-----|-----|-----|-----|-----|-----|-----|-------|---------|-------|---------|-------|---------|
| 1       | 92  |     |     |     |     |     |     |     |     |     |     |       |         |       |         |       |         |
| 2       | 84  | 54  |     |     |     |     |     |     |     |     |     |       |         |       |         |       |         |
| 3       | 38  | 51  | 39  |     |     |     |     |     |     |     |     |       |         |       |         |       |         |
| 4       | 101 | 126 | 38  | 126 |     |     |     |     |     |     |     |       |         |       |         |       |         |
| 5       | 68  | 40  | 78  | 126 | 82  |     |     |     |     |     |     |       |         |       |         |       |         |
| 6       | 61  | 39  | 59  | 126 | 82  | 60  |     |     |     |     |     |       |         |       |         |       |         |
| 7       | 229 | 77  | 227 | 233 | 73  | 69  | 230 |     |     |     |     |       |         |       |         |       |         |
| 8       | 84  | 242 | 242 | 63  | 79  | 242 | 230 | 188 |     |     |     |       |         |       |         |       |         |
| 9       | 109 | 58  | 48  | 120 | 84  | 61  | 259 | 274 | 371 |     |     |       |         |       |         |       |         |
| 10      | 119 | 80  | 489 | 180 | 99  | 77  | 231 | 370 | 443 | 336 |     |       |         |       |         |       |         |
| 11      | 112 | 74  | 449 | 131 | 83  | 185 | 231 | 352 | 401 | 366 | 444 |       |         |       |         |       |         |
| n = 1   | 100 | 79  | 268 | 130 | 134 | 261 | 228 | 177 | 252 | 192 | 213 | 221   |         |       |         |       |         |
| n = 1.5 | 57  | 164 | 149 | 186 | 121 | 297 | 192 | 226 | 251 | 459 | 329 | 231   | 298     |       |         |       |         |
| n = 2   | 62  | 130 | 38  | 170 | 111 | 300 | 194 | 154 | 273 | 436 | 379 | 236   | 287     | 328   |         |       |         |
| n = 2.5 | 65  | 39  | 50  | 165 | 107 | 79  | 204 | 168 | 286 | 452 | 376 | 251   | 342     | 388   | 399     |       |         |
| n = 3   | 67  | 40  | 38  | 162 | 105 | 75  | 207 | 178 | 294 | 455 | 383 | 271   | 407     | 457   | 468     | 471   |         |
| n = 3.5 | 69  | 41  | 174 | 160 | 104 | 269 | 210 | 301 | 300 | 458 | 388 | 295   | 414     | 534   | 543     | 585   | 545     |

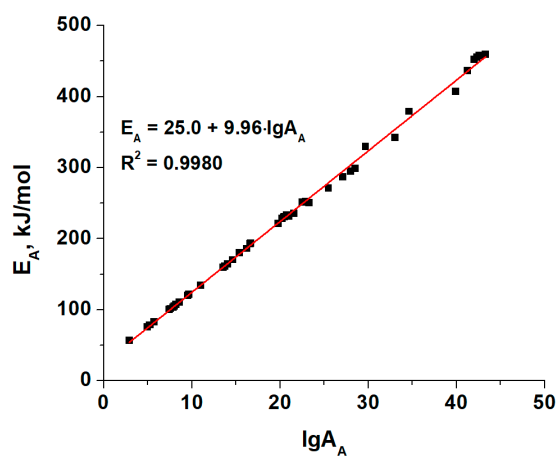

(a)

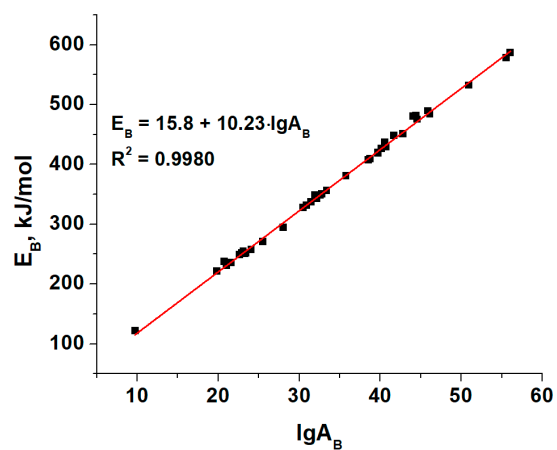

(b)

**Figure S4.** Correlation between  $E$  and  $\lg A$  for (a) stage A and (b) stage B.

*Only results with the determination coefficients  $R^2$  higher than 0.9999 were used in this figure.*

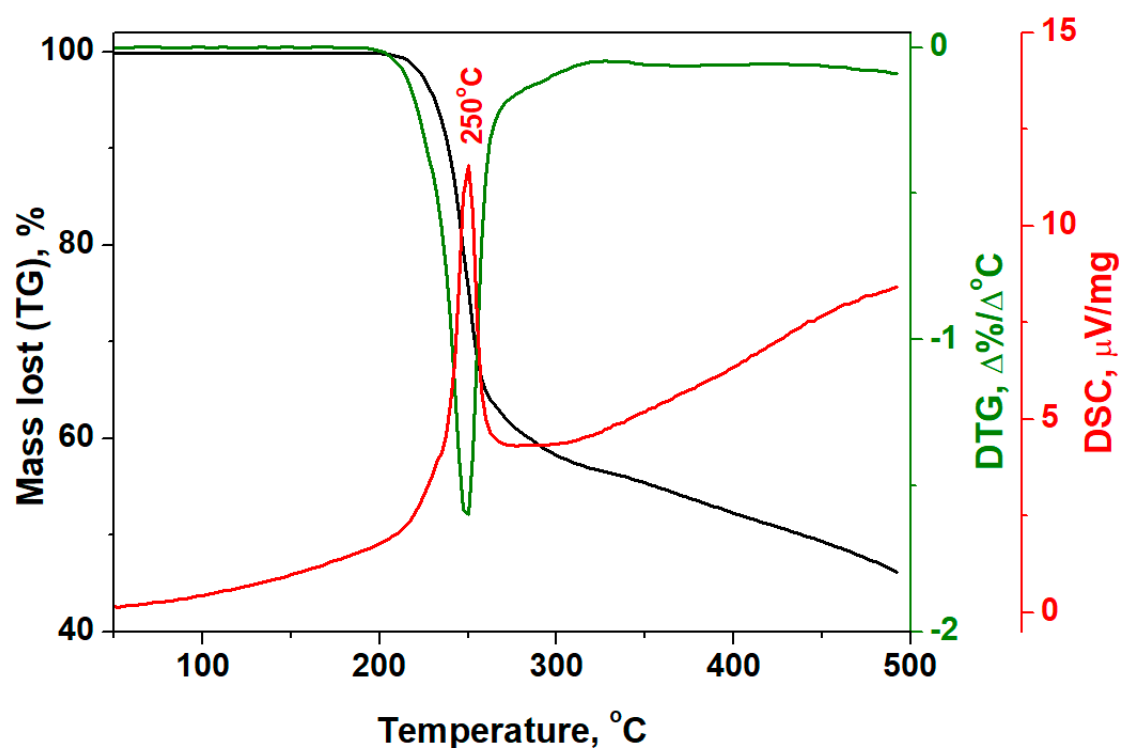

**Figure S5.** Thermal analysis data of decomposition of  $[\text{Ni}(\text{En})_3](\text{ClO}_4)_2$  in He at lower heating rate of  $2.5\text{ }^\circ\text{C}\cdot\text{min}^{-1}$ .
